# Supplementary material for: Molecular Characterization Related to Ovary Early Development Mechanisms after Eyestalk Ablation in Exopalaemon carinicauda
Source: MDPI journal article supplement (doi:10.3390/biology12040596), 2023-04-14

Table S3. Quality Evaluation of the De novo transcriptome data

| Sample   | Clean reads | Clean bases | Error rate(%) | Q20(%) | Q30(%) | GC content(%) |
|----------|-------------|-------------|---------------|--------|--------|---------------|
| OvI_a    | 55882126    | 8229364050  | 0.0246        | 98.22  | 94.50  | 42.29         |
| OvI_b    | 55613822    | 8201873937  | 0.0248        | 98.14  | 94.28  | 41.97         |
| OvI_c    | 48445080    | 7146729229  | 0.0247        | 98.19  | 94.37  | 42.31         |
| SOvI_a   | 52896924    | 7820313970  | 0.0247        | 98.19  | 94.38  | 42.57         |
| SOvI_b   | 53701738    | 7931764637  | 0.0245        | 98.25  | 94.56  | 42.90         |
| SOvI_c   | 45767490    | 6745065273  | 0.0246        | 98.21  | 94.45  | 42.78         |
| HeI_a    | 48711120    | 7221628208  | 0.0248        | 98.16  | 94.30  | 42.68         |
| HeI_b    | 43227492    | 6433246045  | 0.0248        | 98.12  | 94.27  | 43.17         |
| HeI_c    | 45423164    | 6766675750  | 0.0247        | 98.18  | 94.42  | 42.94         |
| SHeI_c   | 51777750    | 7678478304  | 0.0242        | 98.40  | 94.93  | 45.57         |
| SHeI_b   | 52047526    | 7703427907  | 0.0244        | 98.32  | 94.72  | 43.77         |
| SHeI_a   | 46778930    | 6929753120  | 0.0246        | 98.24  | 94.55  | 44.82         |
| OvII_a   | 53622864    | 7913738036  | 0.0248        | 98.16  | 94.31  | 42.19         |
| OvII_b   | 52055498    | 7692270434  | 0.0245        | 98.27  | 94.61  | 42.78         |
| OvII_c   | 48824246    | 7235695862  | 0.0245        | 98.25  | 94.59  | 42.65         |
| SOvII_a  | 53605160    | 7861224617  | 0.0247        | 98.18  | 94.37  | 42.11         |
| SOvII_b  | 47153710    | 6975717993  | 0.0245        | 98.28  | 94.64  | 43.73         |
| SOvII_c  | 57598794    | 8486354462  | 0.0246        | 98.23  | 94.52  | 42.07         |
| HeII_a   | 49056286    | 7290180246  | 0.0245        | 98.25  | 94.60  | 44.96         |
| HeII_b   | 50490098    | 7467213428  | 0.0242        | 98.40  | 94.95  | 44.80         |
| HeII_c   | 48228518    | 7145561673  | 0.0243        | 98.34  | 94.81  | 43.45         |
| SHeII_a  | 52385238    | 7759887937  | 0.0242        | 98.37  | 94.86  | 44.32         |
| SHeII_b  | 56163690    | 8294010626  | 0.0243        | 98.34  | 94.80  | 44.45         |
| SHeII_c  | 53059352    | 7886558574  | 0.0242        | 98.39  | 94.89  | 44.79         |
| OvIII_a  | 53646032    | 7944327277  | 0.0249        | 98.12  | 94.23  | 43.26         |
| OvIII_b  | 50121396    | 7371963365  | 0.0244        | 98.29  | 94.68  | 42.29         |
| OvIII_c  | 47597456    | 7074079301  | 0.0246        | 98.23  | 94.52  | 42.08         |
| SOvIII_a | 42288610    | 6257732949  | 0.0249        | 98.11  | 94.21  | 41.47         |
| SOvIII_b | 50878952    | 7528949373  | 0.0246        | 98.21  | 94.46  | 41.49         |
| SOvIII_c | 44346934    | 6587805554  | 0.0270        | 97.33  | 92.12  | 43.04         |
| SHeIII_a | 46044598    | 6844789384  | 0.0246        | 98.24  | 94.52  | 43.72         |
| SHeIII_b | 45249944    | 6720891232  | 0.0246        | 98.20  | 94.47  | 44.06         |
| SHeIII_c | 50526254    | 7500713045  | 0.0243        | 98.36  | 94.80  | 44.00         |

Table S4. Primer sequence

| primer name        | Gene ID               | primer sequence(5'to3')                     | primer usage                    |
|--------------------|-----------------------|---------------------------------------------|---------------------------------|
| 1-F                | TRINITY_DN10095_c0_g1 | CTTCCTGACGAGGCGGTGAC                        | <i>real-time</i><br>PCR         |
| 1-R                |                       | TGCCTTGGCAAGAAGCCAAA                        |                                 |
| 2-F                | TRINITY_DN10095_c0_g2 | GAGGGCTTCAGCTTCCTGCC                        |                                 |
| 2-R                |                       | CGAAGTCACCGCCTCGTCAG                        |                                 |
| 3-F                | TRINITY_DN24477_c1_g1 | GCCTTTGCCACCTTATACCA                        |                                 |
| 3-R                |                       | TGGTAAGAGACTCTGCGTCA                        |                                 |
| 4-F                | TRINITY_DN72755_c0_g2 | GTCTTGTCCAGTGGATTCA                         |                                 |
| 4-R                |                       | GCTTCATGTCGTACCAGGAG                        |                                 |
| 18S-F              | 18S                   | TGTATCTCAGGGCCTTGTCT                        |                                 |
| 18S-F              |                       | GACGTTTCCTGTACCTGGAC                        |                                 |
| <i>Dmrt1</i> -F    | <i>Dmrt1</i>          | CCGTGAAAACCTCGAGAGGTCCGC                    | <i>in-situ</i><br>hybridization |
| <i>Dmrt1</i> -R    |                       | TAATACGACTCACTATAGGC<br>GTGAGGCACCGAGGCAAGG |                                 |
| <i>Vasa</i> -F     | <i>Vasa</i>           | GCCGTTGCTCACAAGGTGGC                        |                                 |
| <i>Vasa</i> -R     |                       | TAATACGACTCACTATAGG<br>GGGGACGGGAGAGGGAGAGG |                                 |
| <i>Cyp307a1</i> -F | <i>Cyp307a1</i>       | GGAGCGCTTGCCGTGTGCTGA                       |                                 |
| <i>Cyp307a1</i> -R |                       | TAATACGACTCACTATAGGTTCCGCG<br>GCACCGAATCCAC |                                 |

Table S5.The annotation results for 6 Database

| Database   | Exp_Unigene<br>number(%) | Exp_Transcript<br>number(%) | All_Unigene<br>number(%) | All_Transcript<br>number(%) |
|------------|--------------------------|-----------------------------|--------------------------|-----------------------------|
| GO         | 17004(0.1747)            | 30942(0.1624)               | 17006(0.1746)            | 30951(0.1623)               |
| KEGG       | 12237(0.1257)            | 22097(0.1159)               | 12237(0.1257)            | 22105(0.1159)               |
| eggNOG     | 16652(0.1711)            | 29866(0.1567)               | 16652(0.171)             | 29876(0.1566)               |
| NR         | 22286(0.229)             | 40654(0.2133)               | 22288(0.2289)            | 40669(0.2132)               |
| Swiss-Prot | 14588(0.1499)            | 25992(0.1364)               | 14588(0.1498)            | 26001(0.1363)               |
| Pfam       | 17578(0.1806)            | 31416(0.1648)               | 17580(0.1805)            | 31427(0.1647)               |
| Total_anno | 24032(0.2469)            | 43698(0.2293)               | 24034(0.2468)            | 43714(0.2292)               |
| Total      | 97319(1)                 | 190575(1)                   | 97383(1)                 | 190757(1)                   |

Figure S1 The clusters in hepatopancreas by time course

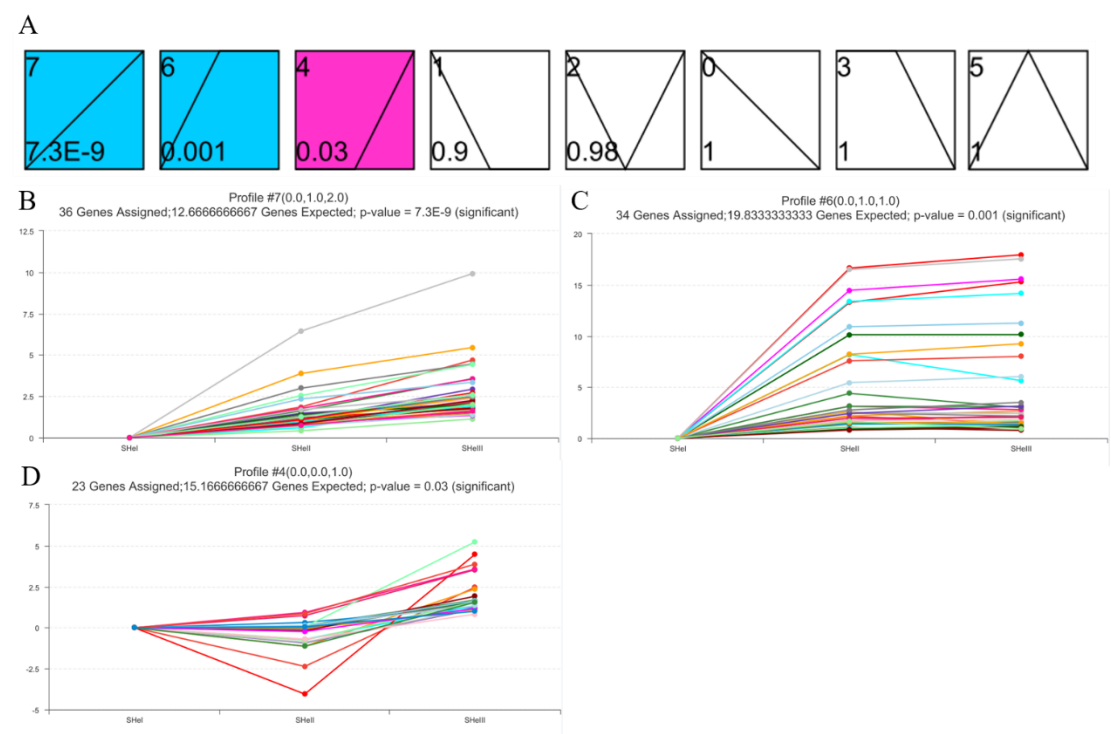

Supplement: s1 [file s1]
